# Supplementary material for: Cisplatin-resistant cells in malignant pleural mesothelioma cell lines show ALDHhighCD44+ phenotype and sphere-forming capacity
Source: PubMed Central journal article supplement (PMC4021184; doi:10.1186/1471-2407-14-304), 2014-04-30

**A****H28**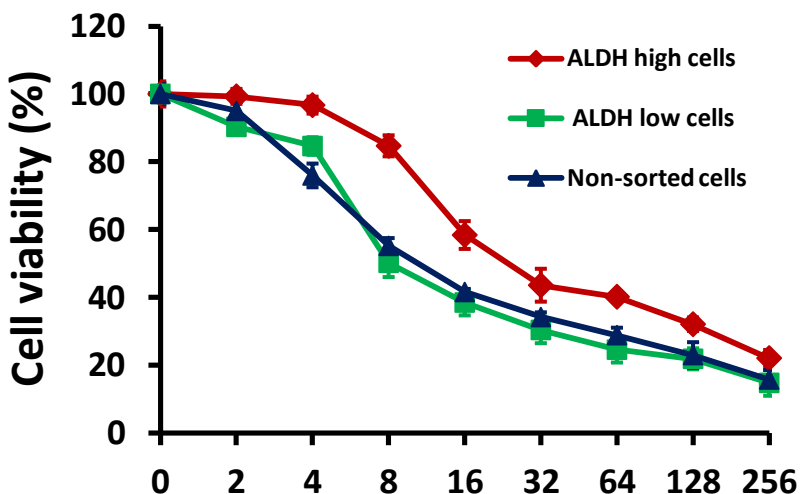**B****H2052**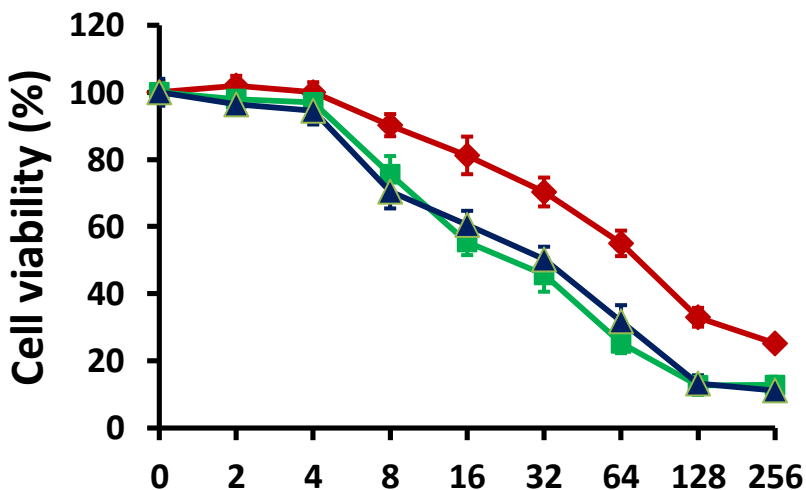**C****Meso4**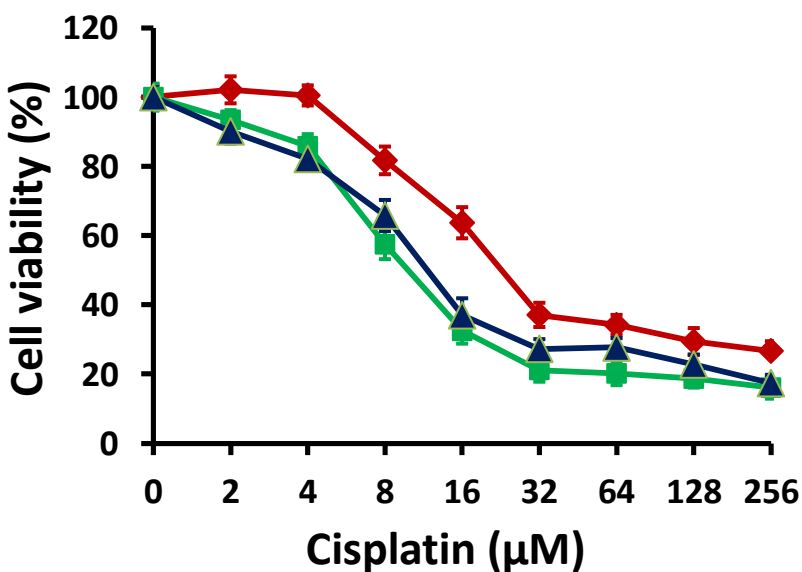

Supplement: 1471-2407-14-304-S1.pdf [file 1471-2407-14-304-S1.pdf]
